# Supplementary material for: Resveratrol, EGCG and Vitamins Modulate Activated T Lymphocytes
Source: MDPI journal article supplement (doi:10.3390/molecules26185600), 2021-09-15
Supplement: s1 [file s1]

## RESVERATROL, EGCG AND VITAMINS MODULATE ACTIVATED T LYMPHOCYTES

**Figure S1:** Cells were negatively selected for CD3<sup>+</sup>, CD4<sup>+</sup> and CD8<sup>+</sup> lymphocytes and stained for CD4 and CD8. Numbers in the quadrants indicate the percentage of positive cells

**Figure S1a:** Staining of CD3<sup>+</sup>-selected PBMCs with anti-CD4 and anti-CD8.

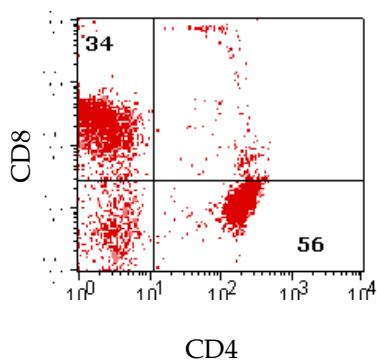

**Figure S1b:** Staining of CD4<sup>+</sup>-selected PBMC with anti-CD4 and anti-CD8

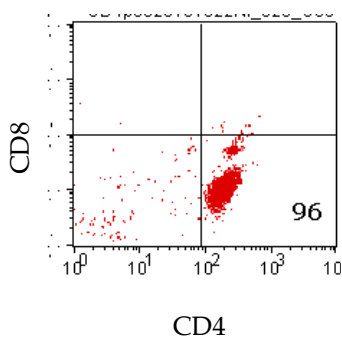

**Figure S1c:** Staining of CD8<sup>+</sup>-selected PBMC with anti-CD4 and anti-CD8.

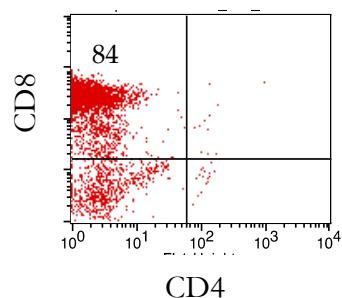

**Figure S2:** Anti-CD3/CD28 activated cells were cultured for 5 days in the presence of the indicated substances and stained for CD4 and CD8 determinants. Numbers in the quadrants indicate the percentage of positive cells. Cells cultured in the absence of substances had a staining profile similar to 'Res'-cells.

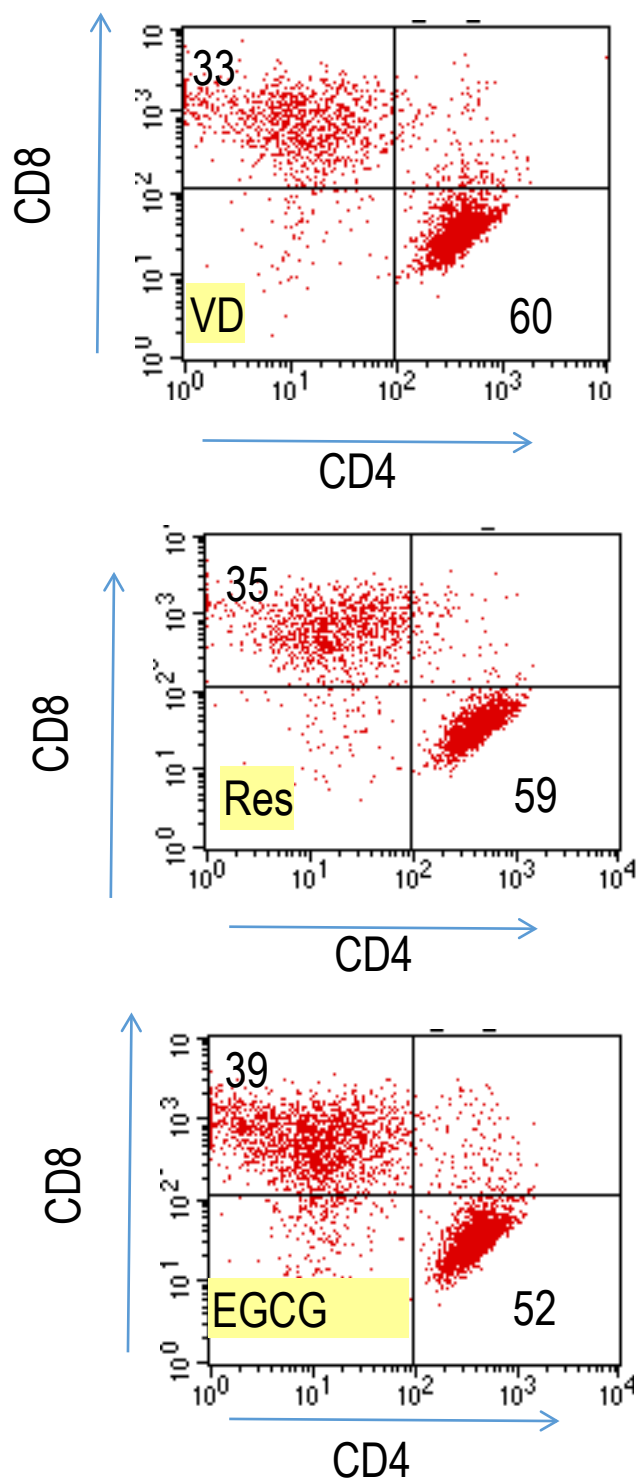

**Table S1a: Production of interleukins and cytokines by CD4<sup>+</sup> and CD8<sup>+</sup> subsets**

CD4<sup>+</sup> or CD8<sup>+</sup> selected PBMC subsets were activated with anti-CD3/CD28 and cultured for 5 days. Secreted interleukins, cytokines and chemokines were measured in culture supernatants by multiplex ELISA.

| Interleukin /Cytokine | CD4 <sup>+</sup> cells<br>pg/ml (±SD) <sup>1)</sup> | CD8 <sup>+</sup> cells<br>pg/ml (±SD) <sup>1)</sup> |
|-----------------------|-----------------------------------------------------|-----------------------------------------------------|
| IL-2                  | 147500±23335                                        | 11900±283                                           |
| INF- $\gamma$         | 20850±2475                                          | 44400±707                                           |
| TNF- $\alpha$         | 10625±1378                                          | 4370±509                                            |
| IL-10                 | 348±33                                              | 46±2                                                |
| IL-13                 | 1885±431                                            | 7035±1845                                           |
| IL-5                  | 198±42                                              | 572±163                                             |
| IL-9                  | 3805±574                                            | 620±187                                             |
| IL-6                  | 607±89                                              | 281±39                                              |
| IL-17                 | 300±15                                              | 44±0                                                |
| CCL5/RANTES           | 8830±876                                            | 27850±502                                           |
| CXCL8/IL-8            | 1365±149                                            | 1240±85                                             |
| CXCL10/IP-10          | 5725±146                                            | 28050±3040                                          |
| MCP-1/CCL2            | 19±5                                                | 128±5                                               |
| MIP-1 $\alpha$ /CCL3  | 6025±827                                            | 10990±1428                                          |
| MIP-1 $\beta$ /CCL4   | 12250±1060                                          | 31550±406                                           |

<sup>1)</sup> N=3

**Table S1b: Production of interleukins and cytokines by CD4<sup>+</sup> and CD8<sup>+</sup> subsets**

CD4<sup>+</sup> or CD8<sup>+</sup> selected PBMC subsets were activated with anti-CD3/CD28 and cultured for 5 days. Secreted interleukins, cytokines and chemokines were measured in culture supernatants by multiplex ELISA.

| Interleukin /Cytokine | CD4 <sup>+</sup> cells<br>pg/ml (±SD) <sup>1)</sup> | CD8 <sup>+</sup> cells<br>pg/ml (±SD) <sup>1)</sup> |
|-----------------------|-----------------------------------------------------|-----------------------------------------------------|
| IL-2                  | 147500±23335                                        | 11900±283                                           |
| INF- $\gamma$         | 20850±2475                                          | 44400±707                                           |
| TNF- $\alpha$         | 10625±1378                                          | 4370±509                                            |
| IL-10                 | 348±33                                              | 46±2                                                |
| IL-13                 | 1885±431                                            | 7035±1845                                           |
| IL-5                  | 198±42                                              | 572±163                                             |
| IL-9                  | 3805±574                                            | 620±187                                             |
| IL-6                  | 607±89                                              | 281±39                                              |
| IL-17                 | 300±15                                              | 44±0                                                |
| CCL5/RANTES           | 8830±876                                            | 27850±502                                           |
| CXCL8/IL-8            | 1365±149                                            | 1240±85                                             |
| CXCL10/IP-10          | 5725±146                                            | 28050±3040                                          |
| MCP-1/CCL2            | 19±5                                                | 128±5                                               |
| MIP-1 $\alpha$ /CCL3  | 6025±827                                            | 10990±1428                                          |
| MIP-1 $\beta$ /CCL4   | 12250±1060                                          | 31550±406                                           |

<sup>1)</sup> N=3

**Table S2:** Prototypic T<sub>h</sub>1 and T<sub>h</sub>2 interleukins produced by anti-CD3/CD28 stimulated CD4<sup>+</sup> lymphocytes in the presence of vitamins and vitamin metabolites  
Cells were cultured for 5 days and the secreted interleukins determined by multiplex ELISA

#### Retinoic Acid and VA

| IL-2 | Retinoic Acid [nM] | IL-2 [ng/mL]             | Vitamin A [nM] | IL-2 [ng/mL] |
|------|--------------------|--------------------------|----------------|--------------|
|      | -                  | 66.1 ± 2.5 <sup>1)</sup> | -              | 66.1 ± 2.5   |
|      | 0.01               | 102.0 ± 3.3              | 10             | 103.7 ± 21.6 |
|      | 0.10               | 118.1 ± 8.1              | 100            | 97.0 ± 2.5   |
|      | 1.00               | 166.4 ± 8.5              | 1000           | 110.0 ± 11.4 |

#### 1,25(OH)D3 and VD

| IL-13 | 1,25(OH) <sub>2</sub> D <sub>3</sub> [nM] | IL-13 [pg/mL] | Vitamin D3 [nM] | IL-13 pg/mL] |
|-------|-------------------------------------------|---------------|-----------------|--------------|
|       | -                                         | 1734 ± 341    | -               | 1725 ± 177   |
|       | 0.01                                      | 3401 ± 239    | 1               | 1945 ± 162   |
|       | 0.10                                      | 5808 ± 598    | 10              | 2885 ± 374   |
|       | 1.00                                      | 9789 ± 1045   | 100             | 4175 ± 7     |

<sup>1)</sup> Mean ± SD of triplicate cultures
